# Supplementary material for: Estimating common dolphin bycatch in the pole-and-line tuna fishery in the Azores
Source: PeerJ. 2018 Feb 12;6:e4285. doi: 10.7717/peerj.4285 (PMC5813588; doi:10.7717/peerj.4285)
Supplement: Supplemental Information 1 [file peerj-06-4285-s001.docx]

**Estimating common dolphin bycatch in the pole-and-line tuna fishery in the Azores**

Maria João Cruz1,2, Miguel Machete2, Gui Menezes1,2, Emer Rogan3 & Mónica A. Silva2,4

1Departamento de Oceanografia e Pescas, Universidade dos Açores, 9901-862 Horta, Portugal.

2MARE-Marine and Environmental Sciences Centre and IMAR – Instituto do Mar, 9901-862 Horta, Açores, Portugal.

3School of Biological, Earth and Environmental Sciences, University College Cork, Enterprise Centre, Distillery Fields, North Mall, Cork, Ireland

4Biology Department, Woods Hole Oceanographic Institution, Woods Hole, USA.

Corresponding Author:

Maria João Cruz

Email address: m.joao83@gmail.com

Supplementary table S1 – Estimated common dolphin bycatch for the bigeye tuna fishery from 1998-2012 with ratio estimate method.

| **Year** | **Estimated bycatch** |
| --- | --- |
| 1998 | 36 (31-40) |
| 1999 | 21 (19-24) |
| 2000 | 9 (8-10) |
| 2001 | 4 (3-5) |
| 2002 | 2 (1-2) |
| 2003 | 1 (1-2) |
| 2004 | 6 (5-7) |
| 2005 | 6 (5-7) |
| 2006 | 2 (2-3) |
| 2007 | 7 (5-9) |
| 2008 | 4 (2-5) |
| 2009 | 15 (13-18) |
| 2010 | 17 (14-20) |
| 2011 | 40 (35-46) |
| 2012 | 24 (21-26) |

Supplementary table S2 – Estimated common dolphin bycatch for the bigeye tuna fishery from 1998-2012 with NB GAM.

| **Year** | **Fleet catch(t)** | **Bycatch rate** | **Estimated bycatch** |
| --- | --- | --- | --- |
| 1998 | 3149.1 | 0.013 | 40 (34-45) |
| 1999 | 1507.5 | 0.022 | 33 (29-36) |
| 2000 | 784.9 | 0.014 | 11 (10-12) |
| 2001 | 349.6 | 0.017 | 6 (5-7) |
| 2002 | 225.2 | 0.015 | 3 (3-4) |
| 2003 | 206.3 | 0.007 | 2 (1-2) |
| 2004 | 876.4 | 0.013 | 11 (9-14) |
| 2005 | 912.4 | 0.004 | 4 (3-5) |
| 2006 | 329.4 | 0.021 | 7 (4-9) |
| 2007 | 1032.4 | 0.008 | 8 (6-11) |
| 2008 | 527.1 | 0.007 | 4 (2-5) |
| 2009 | 2189.6 | 0.008 | 17 (14-20) |
| 2010 | 1921.2 | 0.011 | 20 (18-23) |
| 2011 | 4189.2 | 0.011 | 46 (41-50) |
| 2012 | 3102.8 | 0.016 | 50 (45-55) |
